# Supplementary material
Source: publisher figshare collection journal article supplement (https://tandf.figshare.com/ndownloader/files/14501414)
Supplement: Supplementary file 1 [file 14501414]

## Appendix

Appendix 1: All target statements and corresponding context questions used in experiments 1-3.

| Broad Focus | Do you know what happened yesterday? |
| --- | --- |
|  |  |
| **(a) Daisy warned the owner.** | |
| Narrow Focus | Do you know who warned the owner? |
| Contrastive Focus | Did Jennifer warn the owner? |
| Given | Did Daisy warn the owner? |
|  |  |
| **(b) Damon fried the omelet.** | |
| Narrow Focus | Do you know who fried the omelet? |
| Contrastive Focus | Did Pam fry the omelet? |
| Given | Did Damon fry the omelet? |
|  |  |
| **(c) Dorah filmed the movie.** | |
| Narrow Focus | Do you know who filmed the movie? |
| Contrastive Focus | Did Susy film the movie? |
| Given | Did Dorah film the movie? |
|  |  |
| **(d) Harry raised the window.** | |
| Narrow Focus | Do you know who raised the window? |
| Contrastive Focus | Did Tom raise the window? |
| Given | Did Harry raise the window? |
|  |  |
| **(e) Jamie dyed the laundry.** | |
| Narrow Focus | Do you know who dyed the laundry? |
| Contrastive Focus | Did Colin dye the laundry? |
| Given | Did Jamie dye the laundry? |
|  |  |
| **(f) Jonny helped the warden.** | |
| Narrow Focus | Do you know who helped the warden? |
| Contrastive Focus | Did Liz help the warden? |
| Given | Did Jonny help the warden? |
|  |  |
| **(g) Jonah burned the onion.** | |
| Narrow Focus | Do you know who burned the onion? |
| Contrastive Focus | Did Mark burn the onion? |
| Given | Did Jonah burn the onion? |
|  |  |
| **(h) Maddie found the TV.** | |
| Narrow Focus | Do you know who found the TV? |
| Contrastive Focus | Did Jennifer find the TV? |
| Given | Did Maddie find the TV? |
|  |  |
| **(i) Mary rolled the barrel.** | |
| Narrow Focus | Do you know who rolled the barrel? |
| Contrastive Focus | Did Trisha roll the barrel? |
| Given | Did Mary roll the barrel? |

Appendix 2: Summary of posterior distributions for 1C-2P trials in Experiment 3: Posterior means (95% credible intervals in brackets) for all focus combinations for all five possible responses, given the data and the model. Dark shaded cells indicate conditions in which listeners selected given responses below chance and light shaded cells indicate conditions in which listeners selected given responses above chance according to set inferential criteria (systematically chosen)

| **Target** | **Competitor** | **estimated probability of responses** | | | | |
| --- | --- | --- | --- | --- | --- | --- |
| **never** | **dispreferred** | **equal** | **preferred** | **always** |
| broad | contr. | 0 (0,0) | 0.03 (0.02,0.05) | 0.29 (0.21,0.37) | 0.58 (0.52,0.64) | 0.1 (0.06,0.14) |
| broad | given | 0.01 (0,0.01) | 0.09 (0.05,0.13) | 0.47 (0.39,0.54) | 0.4 (0.3,0.5) | 0.04 (0.02,0.06) |
| broad | narrow | 0.01 (0,0.01) | 0.08 (0.05,0.11) | 0.45 (0.37,0.53) | 0.43 (0.33,0.53) | 0.04 (0.02,0.06) |
| contr. | broad | 0 (0,0.01) | 0.05 (0.03,0.08) | 0.38 (0.28,0.48) | 0.5 (0.41,0.6) | 0.06 (0.03,0.09) |
| contr. | given | 0.01 (0,0.01) | 0.06 (0.03,0.11) | 0.4 (0.27,0.52) | 0.48 (0.34,0.6) | 0.06 (0.02,0.09) |
| contr. | narrow | 0.02 (0.01,0.03) | 0.17 (0.07,0.27) | 0.54 (0.48,0.58) | 0.26 (0.13,0.39) | 0.02 (0.01,0.03) |
| given | broad | 0.01 (0.01,0.02) | 0.15 (0.09,0.2) | 0.54 (0.5,0.58) | 0.28 (0.2,0.36) | 0.02 (0.01,0.03) |
| given | contr. | 0 (0,0) | 0.02 (0.01,0.03) | 0.19 (0.12,0.27) | 0.63 (0.59,0.66) | 0.16 (0.1,0.24) |
| given | narrow | 0.01 (0.01,0.02) | 0.12 (0.07,0.18) | 0.52 (0.46,0.57) | 0.32 (0.22,0.42) | 0.03 (0.01,0.04) |
| narrow | broad | 0.01 (0.01,0.02) | 0.11 (0.07,0.16) | 0.51 (0.45,0.56) | 0.34 (0.24,0.42) | 0.03 (0.02,0.04) |
| narrow | contr. | 0.01 (0.01,0.02) | 0.15 (0.09,0.22) | 0.54 (0.49,0.58) | 0.27 (0.18,0.38) | 0.02 (0.01,0.03) |
| narrow | given | 0.01 (0.01,0.02) | 0.13 (0.08,0.2) | 0.53 (0.47,0.57) | 0.3 (0.2,0.41) | 0.02 (0.01,0.04) |

Appendix 3: Summary of posterior distributions for 2C-1P trials in Experiment 3: Posterior means (95% credible intervals in brackets) for all focus combinations for all five possible responses, given the data and the model. Dark shaded cells indicate conditions in which listeners selected given responses below chance and light shaded cells indicate conditions in which listeners selected given responses above chance according to set inferential criteria.

| **Target** | **Competitor** | **estimated probability of responses** | | | | | |
| --- | --- | --- | --- | --- | --- | --- | --- |
| **never** | **dispreferred** | **equal** | **preferred** | **always** | |
| broad | contr. | 0.03 (0.02,0.04) | 0.24 (0.16,0.32) | 0.41 (0.39,0.44) | 0.29 (0.21,0.38) | 0.03 (0.02,0.05) |
| broad | given | 0.02 (0.01,0.03) | 0.21 (0.15,0.27) | 0.41 (0.38,0.43) | 0.32 (0.24,0.4) | 0.04 (0.02,0.05) |
| broad | narrow | 0.09 (0.05,0.13) | 0.46 (0.39,0.53) | 0.33 (0.27,0.39) | 0.11 (0.07,0.16) | 0.01 (0.01,0.01) |
| contr. | broad | 0.01 (0,0.01) | 0.06 (0.04,0.09) | 0.23 (0.17,0.3) | 0.56 (0.51,0.6) | 0.14 (0.09,0.19) |
| contr. | given | 0.01 (0,0.01) | 0.07 (0.04,0.11) | 0.25 (0.17,0.33) | 0.55 (0.49,0.61) | 0.13 (0.07,0.19) |
| contr. | narrow | 0.05 (0.03,0.08) | 0.36 (0.26,0.46) | 0.39 (0.34,0.43) | 0.18 (0.11,0.25) | 0.02 (0.01,0.02) |
| given | broad | 0.02 (0.01,0.03) | 0.18 (0.12,0.23) | 0.39 (0.35,0.43) | 0.37 (0.29,0.45) | 0.05 (0.03,0.07) |
| given | contr. | 0.02 (0.01,0.03) | 0.18 (0.11,0.27) | 0.39 (0.34,0.44) | 0.36 (0.24,0.47) | 0.04 (0.02,0.07) |
| given | narrow | 0.04 (0.02,0.07) | 0.32 (0.2,0.43) | 0.41 (0.36,0.44) | 0.21 (0.12,0.31) | 0.02 (0.01,0.03) |
| narrow | broad | 0 (0,0.01) | 0.04 (0.03,0.06) | 0.18 (0.13,0.23) | 0.58 (0.56,0.61) | 0.19 (0.13,0.26) |
| narrow | contr. | 0.02 (0.01,0.03) | 0.18 (0.1,0.25) | 0.39 (0.34,0.43) | 0.37 (0.27,0.47) | 0.05 (0.02,0.07) |
| narrow | given | 0.01 (0.01,0.02) | 0.13 (0.08,0.18) | 0.35 (0.29,0.41) | 0.45 (0.35,0.53) | 0.07 (0.04,0.1) |
